# Supplementary material
Source: Springer Nature journal article supplement (https://www.springermedizin.de/resource/supplementary/13049_2013_633_MOESM2_ESM.pdf/9666898)
Supplement: MOESM2 [file 9666898]

# screen shots of the monitors:

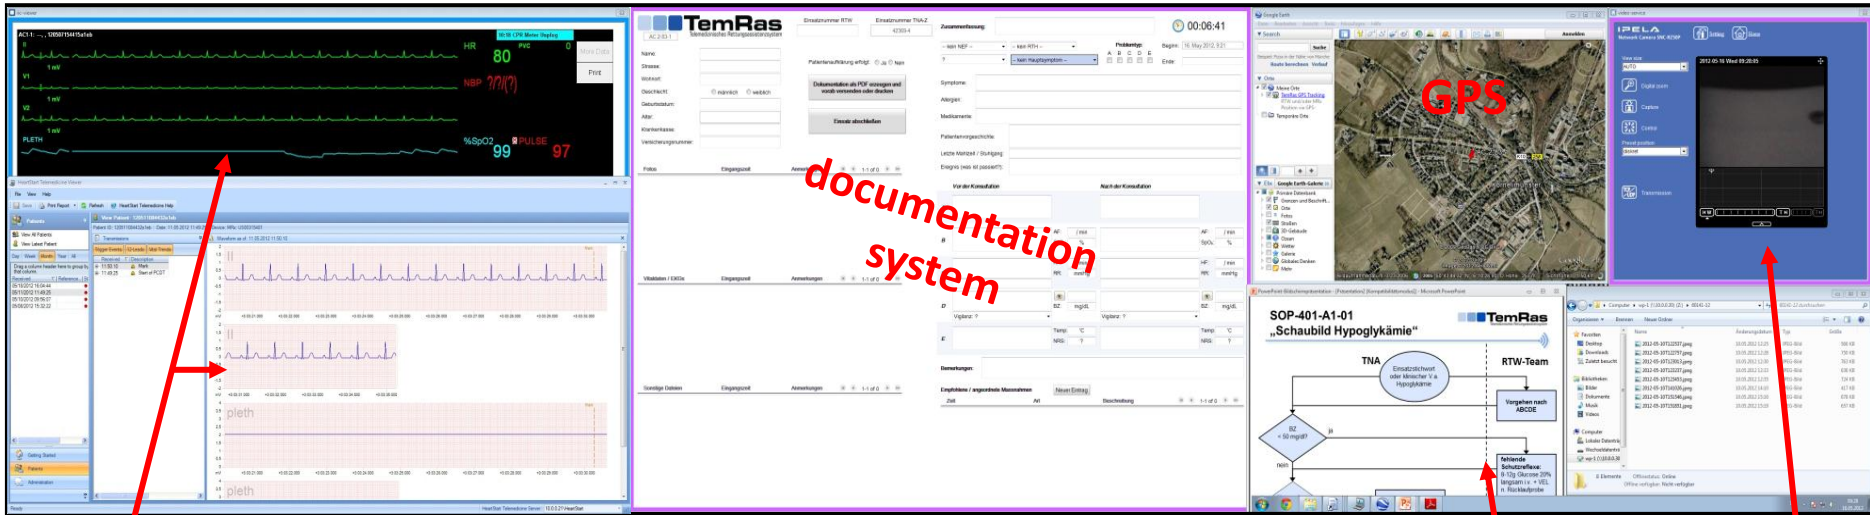

realtime vital data & 12-lead ECG

documentation system

GPS

video camera viewer

SOP flowcharts

## inside the centre:

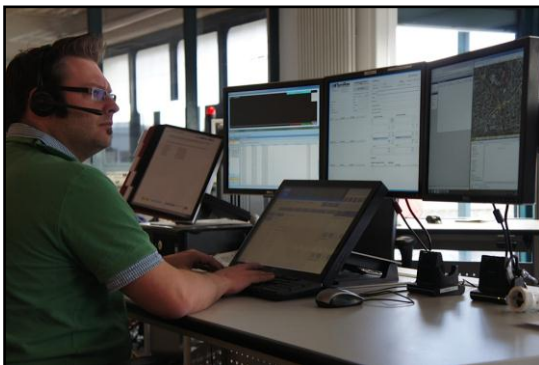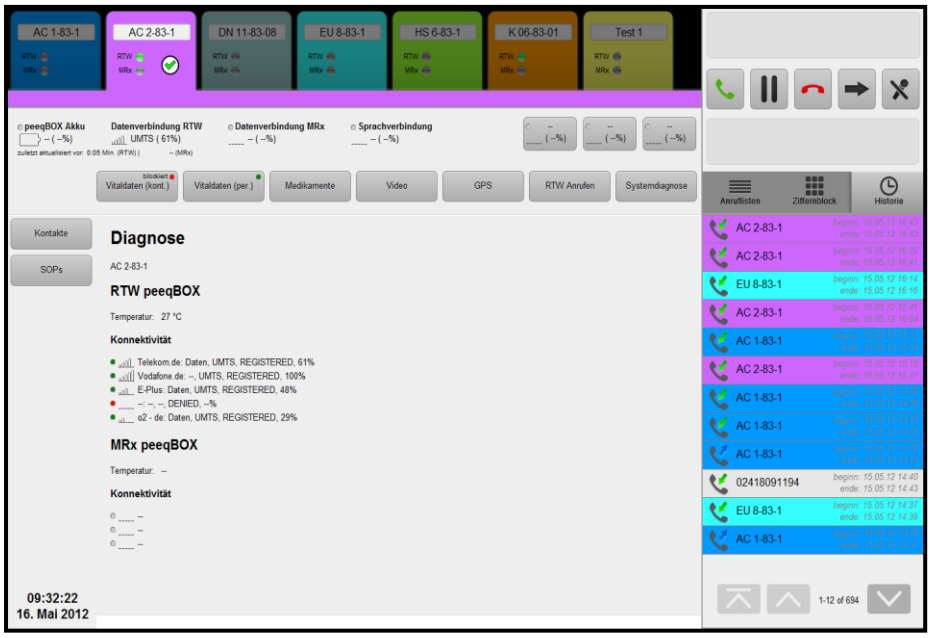

touchscreen for system and audio control
